# Supplementary material for: Regio- and stereospecific ring opening of 1,1-dialkyl-2-(aryloxymethyl)aziridinium salts by bromide
Source: Royal Society of Chemistry journal article supplement (doi:10.1039/b518298k), 2006-01-01
Supplement: b518298k.pdf [file b518298k.pdf]

## Supporting Information

# Regio- and stereospecific ring opening of 1,1-dialkyl-2-(aryloxymethyl)aziridinium salts by bromide

Matthias D'hooghe, Veronique Van Speybroeck, Michel Waroquier, Norbert De Kimpe\*

### Spectral data of compounds 9a, 12, 14a and 16.

2(*S*)-((3-Chlorophenoxy)methyl)-1-(1(*R*)-phenylethyl)aziridine **9a**. Colorless liquid.  $^1\text{H}$  NMR (300 MHz,  $\text{CDCl}_3$ ):  $\delta$  1.46 (3H, d,  $J=6.6$  Hz,  $\text{CH}_3$ ); 1.60 (1H, d,  $J=6.6$  Hz,  $\text{H}_a$ ); 1.82-1.89 (1H, m,  $\text{H}_c$ ); 1.95 (1H, d,  $J=3.3$  Hz,  $\text{H}_b$ ); 2.54 (1H, q,  $J=6.5$  Hz,  $\text{MeCHN}$ ); 3.79-3.90 (2H, m,  $\text{CH}_2\text{O}$ ); 6.60-6.64, 6.73-6.74, 6.86-6.89, 7.09-7.14 and 7.24-7.40 (1H, 1H, 1H, 1H and 5H, 5 $\times$ m,  $\text{CH}_{\text{arom}}$ ).  $^{13}\text{C}$  NMR (75 MHz,  $\text{CDCl}_3$ ):  $\delta$  23.12 ( $\text{CH}_3$ ); 32.41 ( $\text{H}_a\text{CH}_b$ ); 36.74 ( $\text{CH}_c$ ); 69.65 ( $\text{MeCHN}$ ); 70.02 ( $\text{CH}_2\text{O}$ ); 112.89, 114.95, 120.80, 126.76, 127.08, 128.27 and 130.05 ( $\text{CH}_{\text{arom}}$ ); 134.65 (CCl); 144.18 (NCHC<sub>quat</sub>); 159.32 (CO). IR (NaCl,  $\text{cm}^{-1}$ ):  $\nu$  = 3062, 3028, 2974, 2926, 2869, 1594, 1484, 1232, 1030, 700. MS (70 eV)  $m/z$  (%): 287/9 ( $\text{M}^+$ , 2); 272/4 (5); 160 (35); 153 (23); 105 (100); 79 (10); 77 (12); 56 (10). Flash chromatography ( $\text{SiO}_2$ ): Hexane/EtOAc 4/1,  $R_f$  = 0.18.  $\alpha_D = -27.2^\circ$  ( $c$  = 0.42, MeOH). 2(*R*)-((3-Chlorophenoxy)methyl)-1-(1(*R*)-phenylethyl)aziridine **12**. Colorless liquid.  $^1\text{H}$  NMR (300 MHz,  $\text{CDCl}_3$ ):  $\delta$  1.45 (1H, d,  $J=6.6$  Hz,  $\text{H}_b$ ); 1.46 (3H, d,  $J=6.6$  Hz,  $\text{CH}_3$ ); 1.70 (1H, d,  $J=3.6$  Hz,  $\text{H}_a$ ); 1.94-2.01 (1H, m,  $\text{H}_c$ ); 2.52 (1H, q,  $J=6.6$  Hz,  $\text{MeCHN}$ ); 3.88 and 4.09 (2H, 2 $\times$ d $\times$ d,  $J=4.4, 7.2, 10.3$  Hz, ( $\text{HCH}$ )O); 6.82-6.86, 6.92-6.95, 6.98-7.00 and 7.17-7.40 (1H, 1H, 1H and 6H, 4 $\times$ m,  $\text{CH}_{\text{arom}}$ ).  $^{13}\text{C}$  NMR (75 MHz,  $\text{CDCl}_3$ ):  $\delta$  23.24 ( $\text{CH}_3$ ); 31.16 ( $\text{H}_a\text{CH}_b$ ); 38.25 ( $\text{CH}_c$ ); 69.65 ( $\text{MeCHN}$ ); 70.68 ( $\text{CH}_2\text{O}$ ); 113.18, 115.21, 120.95, 126.77, 127.08, 128.36 and 130.15 ( $\text{CH}_{\text{arom}}$ ); 134.79 (CCl); 144.27 (NCHC<sub>quat</sub>); 159.57 (CO). IR (NaCl,  $\text{cm}^{-1}$ ):  $\nu$  = 3061, 3028, 2971, 2926, 2869, 1595, 1479, 1231, 1031, 700. MS (70 eV)  $m/z$  (%): 287/9 ( $\text{M}^+$ , 2); 272/4 (3); 160 (31); 153 (20); 105 (100); 79 (7); 77 (10); 56 (8). Flash chromatography ( $\text{SiO}_2$ ): Hexane/EtOAc 4/1,  $R_f$  = 0.48.  $\alpha_D = +9.8^\circ$  ( $c$  = 0.92, MeOH).

*N*-Benzyl-*N*-(2(*R*)-bromo-3-(3-chlorophenoxy)propyl)-(1(*R*)-*N*-phenylethyl)amine **14a**. Colorless viscous oil.  $^1\text{H}$  NMR (300 MHz,  $\text{CDCl}_3$ ):  $\delta$  1.42 (3H, d,  $J=6.9$  Hz,  $\text{CH}_3$ ); 2.98 (2H, d,  $J=7.2$  Hz,  $\text{CHCH}_2\text{N}$ ); 3.59 (1H, d $\times$ d,  $J=6.5, 10.0$  Hz, ( $\text{HCH}$ )O); 3.66 and 3.69 (2H, 2 $\times$ d,  $J=13.5$  Hz,  $\text{Ar}(\text{HCH})\text{N}$ ); 3.93-4.51 (3H, m,  $\text{CHBr}$ ,  $\text{CHN}$  and ( $\text{HCH}$ )O); 6.59-6.64, 6.91-6.95 and 7.13-7.41 (2H, 1H and 11H, 3 $\times$ m,  $\text{CH}_{\text{arom}}$ ).  $^{13}\text{C}$  NMR (75 MHz,  $\text{CDCl}_3$ ):  $\delta$  11.92 ( $\text{CH}_3$ ); 49.62 ( $\text{CHBr}$ ); 54.02 ( $\text{CHCH}_2\text{N}$ ); 56.00 ( $\text{ArCH}_2\text{N}$ ); 58.13 ( $\text{CHN}$ ); 70.13 ( $\text{CH}_2\text{O}$ ); 113.23, 114.74, 121.03, 127.12, 127.26, 127.99, 128.13,

128.39, 128.88 and 129.98 ( $\text{CH}_{\text{arom}}$ ); 134.66 (CCl); 139.43 and 142.45 ( $\text{NCH}_2\text{C}_{\text{quat}}$  and  $\text{NCHC}_{\text{quat}}$ ); 158.88 (CO). IR (NaCl,  $\text{cm}^{-1}$ ):  $\nu = 3062, 3028, 2970, 2932, 1596, 1481, 1453, 1428, 1232, 750, 699$ . MS (70 eV)  $m/z$  (%): no  $\text{M}^+$ ; 378/80 ( $\text{M}^+ - \text{Br}$ , 100). Flash chromatography ( $\text{SiO}_2$ ): Hexane/EtOAc 9/1,  $R_f = 0.55$ .  $\alpha_D = -7.3^\circ$  ( $c = 2.06, \text{CH}_2\text{Cl}_2$ ). *N*-Benzyl-*N*-(2(*S*)-bromo-3-(3-chlorophenoxy)propyl)-(1(*R*)-*N*-phenylethyl)amine **16**. Colorless viscous oil.  $^1\text{H}$  NMR (300 MHz,  $\text{CDCl}_3$ ):  $\delta$  1.43 (3H, d,  $J=6.9$  Hz,  $\text{CH}_3$ ); 2.88 and 3.16 (2H,  $2 \times d \times d$ ,  $J=5.1, 9.4, 14.1$  Hz,  $\text{CH}(\text{HCH})\text{N}$ ); 3.47 and 3.66 (2H,  $2 \times d$ ,  $J=13.6$  Hz,  $\text{Ar}(\text{HCH})\text{N}$ ); 3.87-4.14 (4H, m,  $\text{CHBr}$ ,  $\text{CHN}$  and  $\text{CH}_2\text{O}$ ); 6.69-6.73, 6.78-6.80, 6.92-6.95 and 7.14-7.35 (1H, 1H, 1H and 11H,  $4 \times m$ ,  $\text{CH}_{\text{arom}}$ ).  $^{13}\text{C}$  NMR (75 MHz,  $\text{CDCl}_3$ ):  $\delta$  16.25 ( $\text{CH}_3$ ); 49.67 ( $\text{CHBr}$ ); 54.48 ( $\text{CHCH}_2\text{N}$ ); 55.99 ( $\text{ArCH}_2\text{N}$ ); 59.91 ( $\text{CHN}$ ); 69.84 ( $\text{CH}_2\text{O}$ ); 113.17, 114.86, 121.14, 127.14, 127.17, 127.87, 128.16, 128.34, 128.80 and 130.10 ( $\text{CH}_{\text{arom}}$ ); 134.71 (CCl); 139.50 and 141.95 ( $\text{NCH}_2\text{C}_{\text{quat}}$  and  $\text{NCHC}_{\text{quat}}$ ); 158.91 (CO). IR (NaCl,  $\text{cm}^{-1}$ ):  $\nu = 3063, 3028, 2972, 2933, 2838, 1595, 1480, 1453, 1247, 1231, 734, 700$ . MS (70 eV)  $m/z$  (%): no  $\text{M}^+$ ; 378/80 ( $\text{M}^+ - \text{Br}$ , 100). Flash chromatography ( $\text{SiO}_2$ ): Hexane/EtOAc 29/1,  $R_f = 0.35$ .  $\alpha_D = +25.1^\circ$  ( $c = 1.47, \text{CH}_2\text{Cl}_2$ ).
